# Supplementary material for: Nitric oxide reduction reaction for efficient ammonia synthesis on topological nodal-line semimetal Cu2Si monolayer
Source: Royal Society of Chemistry journal article supplement (doi:10.1039/d2ta00504b), 2022-01-01
Supplement: d2ta00504b1.pdf [file d2ta00504b1.pdf]

**Nitric Oxide Reduction Reaction for Efficient Ammonia Synthesis on  
Topological Nodal-Line Semimetal Cu<sub>2</sub>Si Monolayer**

Zebin Ren, Haona Zhang, Shuhua Wang, Baibiao Huang, Ying Dai\* and Wei Wei\*

*School of Physics, State Key Laboratory of Crystal Materials, Shandong University,*

*Jinan 250100, China*

\* Corresponding authors: [daiy60@sdu.edu.cn](mailto:daiy60@sdu.edu.cn) (Y. Dai), [weiw@sdu.edu.cn](mailto:weiw@sdu.edu.cn) (W. Wei)

**Table S1** Elementary reactions for all the considered pathways for NORR towards NH<sub>3</sub> synthesis.

| <b>End-on</b>                                                                                     |                                                                                                   |
|---------------------------------------------------------------------------------------------------|---------------------------------------------------------------------------------------------------|
| <b>N-distal</b>                                                                                   | <b>N-alternating</b>                                                                              |
| $\text{NO (g)} + * \rightarrow * \text{NO}$                                                       | $\text{NO (g)} + * \rightarrow * \text{NO}$                                                       |
| $* \text{NO} + \text{H}^+ + \text{e}^- \rightarrow * \text{HNO}$                                  | $* \text{NO} + \text{H}^+ + \text{e}^- \rightarrow * \text{HNO}$                                  |
| $* \text{HNO} + \text{H}^+ + \text{e}^- \rightarrow * \text{H}_2\text{NO}$                        | $* \text{HNO} + \text{H}^+ + \text{e}^- \rightarrow * \text{HNOH}$                                |
| $* \text{H}_2\text{NO} + \text{H}^+ + \text{e}^- \rightarrow * \text{H}_2\text{NOH}$              | $* \text{HNOH} + \text{H}^+ + \text{e}^- \rightarrow * \text{H}_2\text{NOH}$                      |
| $* \text{H}_2\text{NOH} + \text{H}^+ + \text{e}^- \rightarrow * \text{NH}_2 + \text{H}_2\text{O}$ | $* \text{H}_2\text{NOH} + \text{H}^+ + \text{e}^- \rightarrow * \text{NH}_2 + \text{H}_2\text{O}$ |
| $* \text{NH}_2 + \text{H}^+ + \text{e}^- \rightarrow * \text{NH}_3$                               | $* \text{NH}_2 + \text{H}^+ + \text{e}^- \rightarrow * \text{NH}_3$                               |
| <hr/>                                                                                             |                                                                                                   |
| <b>O-alternating</b>                                                                              | <b>O-distal</b>                                                                                   |
| $\text{NO (g)} + * \rightarrow * \text{NO}$                                                       | $\text{NO (g)} + * \rightarrow * \text{NO}$                                                       |
| $* \text{NO} + \text{H}^+ + \text{e}^- \rightarrow * \text{NOH}$                                  | $* \text{NO} + \text{H}^+ + \text{e}^- \rightarrow * \text{NOH}$                                  |
| $* \text{NOH} + \text{H}^+ + \text{e}^- \rightarrow * \text{HNOH}$                                | $* \text{NOH} + \text{H}^+ + \text{e}^- \rightarrow * \text{N} + \text{H}_2\text{O}$              |
| $* \text{HNOH} + \text{H}^+ + \text{e}^- \rightarrow * \text{NH} + \text{H}_2\text{O}$            | $* \text{N} + \text{H}^+ + \text{e}^- \rightarrow * \text{NH}$                                    |
| $* \text{NH} + \text{H}^+ + \text{e}^- \rightarrow * \text{NH}_2$                                 | $* \text{NH} + \text{H}^+ + \text{e}^- \rightarrow * \text{NH}_2$                                 |
| $* \text{NH}_2 + \text{H}^+ + \text{e}^- \rightarrow * \text{NH}_3$                               | $* \text{NH}_2 + \text{H}^+ + \text{e}^- \rightarrow * \text{NH}_3$                               |
| <hr/>                                                                                             |                                                                                                   |
| <b>Side-on</b>                                                                                    |                                                                                                   |
| <b>O-first</b>                                                                                    | <b>O-enzymatic</b>                                                                                |
| $\text{NO (g)} + * \rightarrow * \text{NO}$                                                       | $\text{NO (g)} + * \rightarrow * \text{NO}$                                                       |
| $* \text{NO} + \text{H}^+ + \text{e}^- \rightarrow * \text{NOH}$                                  | $* \text{NO} + \text{H}^+ + \text{e}^- \rightarrow * \text{NOH}$                                  |
| $* \text{NOH} + \text{H}^+ + \text{e}^- \rightarrow * \text{N} + \text{H}_2\text{O}$              | $* \text{NOH} + \text{H}^+ + \text{e}^- \rightarrow * \text{HNOH}$                                |
| $* \text{N} + \text{H}^+ + \text{e}^- \rightarrow * \text{NH}$                                    | $* \text{HNOH} + \text{H}^+ + \text{e}^- \rightarrow * \text{NH} + \text{H}_2\text{O}$            |
| $* \text{NH} + \text{H}^+ + \text{e}^- \rightarrow * \text{NH}_2$                                 | $* \text{NH} + \text{H}^+ + \text{e}^- \rightarrow * \text{NH}_2$                                 |
| $* \text{NH}_2 + \text{H}^+ + \text{e}^- \rightarrow * \text{NH}_3$                               | $* \text{NH}_2 + \text{H}^+ + \text{e}^- \rightarrow * \text{NH}_3$                               |
| <hr/>                                                                                             |                                                                                                   |
| <b>N-enzymatic</b>                                                                                | <b>N-first</b>                                                                                    |
| $\text{NO (g)} + * \rightarrow * \text{NO}$                                                       | $\text{NO (g)} + * \rightarrow * \text{NO}$                                                       |
| $* \text{NO} + \text{H}^+ + \text{e}^- \rightarrow * \text{HNO}$                                  | $* \text{NO} + \text{H}^+ + \text{e}^- \rightarrow * \text{HNO}$                                  |
| $* \text{HNO} + \text{H}^+ + \text{e}^- \rightarrow * \text{HNOH}$                                | $* \text{HNO} + \text{H}^+ + \text{e}^- \rightarrow * \text{H}_2\text{NO}$                        |
| $* \text{HNOH} + \text{H}^+ + \text{e}^- \rightarrow * \text{H}_2\text{NOH}$                      | $* \text{H}_2\text{NO} + \text{H}^+ + \text{e}^- \rightarrow * \text{O} + \text{NH}_3$            |
| $* \text{H}_2\text{NOH} + \text{H}^+ + \text{e}^- \rightarrow * \text{NH}_2 + \text{H}_2\text{O}$ | $* \text{O} + \text{H}^+ + \text{e}^- \rightarrow * \text{OH}$                                    |
| $* \text{NH}_2 + \text{H}^+ + \text{e}^- \rightarrow * \text{NH}_3$                               | $* \text{OH} + \text{H}^+ + \text{e}^- \rightarrow * \text{H}_2\text{O}$                          |

**Table S2** Computed total energies ( $E$ ), zero-point energies ( $E_{\text{ZPE}}$ ) and entropy ( $TS$ ) of NORR intermediates on Cu–Si-bridge site with N-end configuration of NO adsorption.

|                  | $E$ (eV) | $E_{\text{ZPE}}$ (eV) | $TS$ (eV) | $G$ (eV) |
|------------------|----------|-----------------------|-----------|----------|
| *NO              | -121.20  | 0.18                  | 0.13      | -121.15  |
| *NOH             | -124.85  | 0.47                  | 0.15      | -124.52  |
| *HNOH            | -129.41  | 0.75                  | 0.18      | -128.84  |
| *NH              | -119.79  | 0.38                  | 0.04      | -119.45  |
| *NH <sub>2</sub> | -124.42  | 0.72                  | 0.07      | -123.77  |
| *NH <sub>3</sub> | -128.41  | 1.03                  | 0.15      | -127.53  |

**Table S3** Computed total energies ( $E$ ), zero-point energies ( $E_{\text{ZPE}}$ ) and entropy ( $TS$ ) of NORR intermediates on Cu–Si-bridge site with NO-side configuration of NO adsorption.

|                     | $E$ (eV) | $E_{\text{ZPE}}$ (eV) | $TS$ (eV) | $G$ (eV) |
|---------------------|----------|-----------------------|-----------|----------|
| *NO                 | -120.57  | 0.16                  | 0.11      | -120.52  |
| *HNO                | -125.27  | 0.47                  | 0.13      | -124.89  |
| *H <sub>2</sub> NO  | -129.99  | 0.84                  | 0.14      | -129.29  |
| *HNOH               | -128.53  | 0.78                  | 0.15      | -127.89  |
| *O                  | -114.78  | 0.07                  | 0.06      | -114.77  |
| *H <sub>2</sub> NOH | -132.76  | 1.09                  | 0.26      | -131.92  |
| *NH                 | -119.79  | 0.38                  | 0.04      | -119.45  |
| *OH                 | -119.40  | 0.34                  | 0.14      | -119.20  |
| *H <sub>2</sub> O   | -122.49  | 0.65                  | 0.17      | -122.02  |

**Table S4** Computed total energies ( $E$ ), zero-point energies ( $E_{\text{ZPE}}$ ) and entropy ( $TS$ ) of NORR intermediates on Si site with N-end configuration of NO adsorption.

|                     | $E$ (eV) | $E_{\text{ZPE}}$ (eV) | $TS$ (eV) | $G$ (eV) |
|---------------------|----------|-----------------------|-----------|----------|
| *NO                 | -121.04  | 0.17                  | 0.18      | -121.04  |
| *HNO                | -125.15  | 0.47                  | 0.21      | -124.89  |
| *HNOH               | -129.31  | 0.78                  | 0.22      | -128.75  |
| *H <sub>2</sub> NOH | -133.52  | 1.13                  | 0.21      | -132.60  |
| *NH <sub>2</sub>    | -124.36  | 0.65                  | 0.16      | -123.86  |
| *NH <sub>3</sub>    | -128.41  | 1.03                  | 0.15      | -127.53  |

**Table S5** Computed total energies ( $E$ ), zero-point energies ( $E_{\text{ZPE}}$ ) and entropy ( $TS$ ) of NORR intermediates on Si site with N-end configuration of NO adsorption by DFT +  $U$  method.

|                     | $E$ (eV) | $E_{\text{ZPE}}$ (eV) | $TS$ (eV) | $G$ (eV) |
|---------------------|----------|-----------------------|-----------|----------|
| *NO                 | -96.82   | 0.18                  | 0.16      | -96.80   |
| *HNO                | -100.85  | 0.47                  | 0.20      | -100.58  |
| *HNOH               | -104.94  | 0.77                  | 0.25      | -104.41  |
| *H <sub>2</sub> NOH | -109.14  | 1.13                  | 0.21      | -108.21  |
| *NH <sub>2</sub>    | -99.98   | 0.66                  | 0.15      | -99.48   |
| *NH <sub>3</sub>    | -104.03  | 1.03                  | 0.14      | -103.14  |

**Table S6** Computed total energies ( $E$ ), zero-point energies ( $E_{\text{ZPE}}$ ) and entropy ( $TS$ ) of NORR intermediates on Si site with N-end configuration of NO adsorption, using a  $4\times 4$  supercell.

|                     | $E$ (eV) | $E_{\text{ZPE}}$ (eV) | $TS$ (eV) | $G$ (eV) |
|---------------------|----------|-----------------------|-----------|----------|
| *NO                 | -204.74  | 0.18                  | 0.17      | -204.73  |
| *HNO                | -208.89  | 0.47                  | 0.18      | -208.6   |
| *HNOH               | -213.00  | 0.77                  | 0.21      | -212.43  |
| *H <sub>2</sub> NOH | -217.24  | 1.13                  | 0.21      | -216.32  |
| *NH <sub>2</sub>    | -208.06  | 0.65                  | 0.17      | -207.58  |
| *NH <sub>3</sub>    | -212.13  | 1.03                  | 0.15      | -211.25  |

**Table S7** Computed total energies ( $E$ ), zero-point energies ( $E_{\text{ZPE}}$ ) and entropy ( $TS$ ) of NORR intermediates on Si site with N-end configuration of NO adsorption after including the solvation effects.

|                     | $E$ (eV) | $E_{\text{ZPE}}$ (eV) | $TS$ (eV) | $G$ (eV) |
|---------------------|----------|-----------------------|-----------|----------|
| *NO                 | -120.98  | 0.16                  | 0.18      | -121.00  |
| *HNO                | -125.26  | 0.47                  | 0.14      | -124.93  |
| *HNOH               | -129.45  | 0.78                  | 0.22      | -128.90  |
| *H <sub>2</sub> NOH | -133.86  | 1.15                  | 0.19      | -132.90  |
| *NH <sub>2</sub>    | -124.41  | 0.64                  | 0.08      | -123.85  |
| *NH <sub>3</sub>    | -128.93  | 1.06                  | 0.11      | -127.98  |

**Table S8** Computed NORR free energy changes ( $\Delta G$ ) of elementary steps for NORR



on Si site along the N-alternating pathway under different calculation conditions. The unit is eV.

| Elementary Reactions                                                                            | DFT   | DFT +<br>U | DFT   | DFT +<br>solvation |
|-------------------------------------------------------------------------------------------------|-------|------------|-------|--------------------|
|                                                                                                 | 3×3   | 3×3        | 4×4   | 3×3                |
| $\text{NO (g)} + * \rightarrow *\text{NO}$                                                      | -0.5  | -0.66      | -0.46 | -0.53              |
| $*\text{NO} + \text{H}^+ + \text{e}^- \rightarrow *\text{HNO}$                                  | -0.4  | -0.34      | -0.43 | -0.48              |
| $*\text{HNO} + \text{H}^+ + \text{e}^- \rightarrow *\text{HNOH}$                                | -0.42 | -0.39      | -0.39 | -0.52              |
| $*\text{HNOH} + \text{H}^+ + \text{e}^- \rightarrow *\text{H}_2\text{NOH}$                      | -0.4  | -0.36      | -0.44 | -0.56              |
| $*\text{H}_2\text{NOH} + \text{H}^+ + \text{e}^- \rightarrow *\text{NH}_2 + \text{H}_2\text{O}$ | -2.04 | -2.04      | -2.04 | -1.72              |
| $*\text{NH}_2 + \text{H}^+ + \text{e}^- \rightarrow *\text{NH}_3$                               | -0.23 | -0.21      | -0.22 | -0.68              |

**Table S9** Computed total energies ( $E$ ), zero-point energies ( $E_{\text{ZPE}}$ ) and entropy ( $TS$ ) of NORR intermediates on pure Cu(111) surface.

| $E$ (eV) | $E_{\text{ZPE}}$ (eV) | $TS$ (eV) | $G$ (eV) |
|----------|-----------------------|-----------|----------|
|----------|-----------------------|-----------|----------|

|                  |         |      |      |         |
|------------------|---------|------|------|---------|
| *NO              | -196.20 | 0.16 | 0.13 | -196.17 |
| *NOH             | -199.63 | 0.45 | 0.16 | -199.33 |
| *N               | -189.42 | 0.08 | 0.03 | -189.37 |
| *NH              | -194.42 | 0.29 | 0.01 | -194.14 |
| *NH <sub>2</sub> | -198.61 | 0.69 | 0.08 | -197.99 |
| *NH <sub>3</sub> | -202.80 | 1.01 | 0.18 | -201.97 |

**Table S10** Computed total energies ( $E$ ), zero-point energies ( $E_{\text{ZPE}}$ ) and entropy ( $TS$ ) of NORR intermediates on Si@Cu(111) surface.

|               | $E$ (eV) | $E_{\text{ZPE}}$ (eV) | $TS$ (eV) | $G$ (eV) |
|---------------|----------|-----------------------|-----------|----------|
| N-alternating |          |                       |           |          |
| *NO           | -198.05  | 0.16                  | 0.19      | -198.07  |

|                     |         |      |      |         |
|---------------------|---------|------|------|---------|
| *HNO                | -201.97 | 0.46 | 0.14 | -201.65 |
| *HNOH               | -206.14 | 0.75 | 0.26 | -205.65 |
| *H <sub>2</sub> NOH | -210.29 | 1.11 | 0.23 | -209.41 |
| *NH <sub>2</sub>    | -201.17 | 0.65 | 0.15 | -200.64 |
| *NH <sub>3</sub>    | -205.11 | 1.01 | 0.18 | -204.27 |
| O-distal            |         |      |      |         |
| *NO                 | -198.37 | 0.16 | 0.13 | -198.35 |
| *NOH                | -202.31 | 0.47 | 0.14 | -201.97 |
| *N                  | -192.60 | 0.09 | 0.03 | -192.54 |
| *NH                 | -197.28 | 0.39 | 0.04 | -196.93 |
| *NH <sub>2</sub>    | -201.17 | 0.65 | 0.15 | -200.64 |
| *NH <sub>3</sub>    | -205.11 | 1.01 | 0.18 | -204.27 |

**Table S11** Computed total energies ( $E$ ), zero-point energies ( $E_{\text{ZPE}}$ ) and entropy ( $TS$ ) of the intermediates for N<sub>2</sub> synthesis on Cu<sub>2</sub>Si monolayer.

|                    | $E$ (eV) | $E_{\text{ZPE}}$ (eV) | $TS$ (eV) | $G$ (eV) |
|--------------------|----------|-----------------------|-----------|----------|
| *NONO              | -134.84  | 0.39                  | 0.25      | -134.70  |
| *NONOH             | -138.98  | 0.73                  | 0.29      | -138.55  |
| *NNO               | -128.62  | 0.29                  | 0.18      | -128.51  |
| *NNOH              | -132.95  | 0.59                  | 0.21      | -132.57  |
| * + N <sub>2</sub> | -124.01  | 0.15                  | 0.59      | -124.44  |



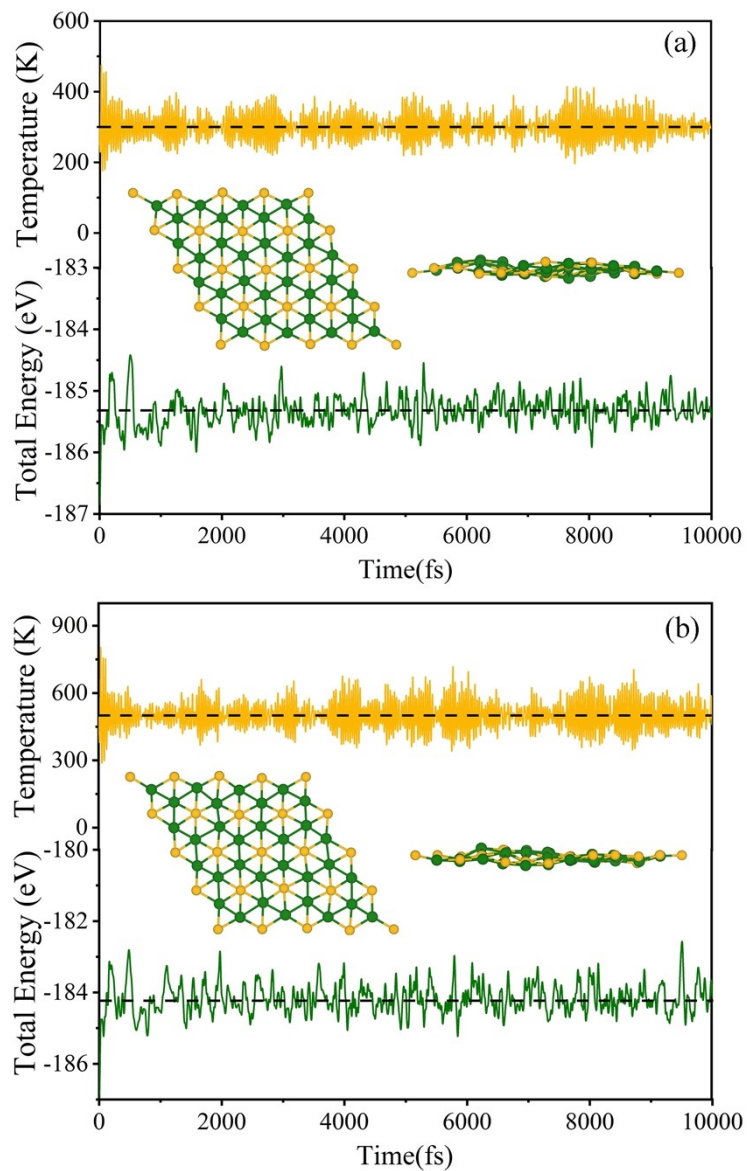

**Fig. S1** Variation of total energy and temperature versus the AIMD simulation time for  $\text{Cu}_2\text{Si}$  monolayer at (a) 300 K and (b) 500 K. Insets denote the top and side views of  $\text{Cu}_2\text{Si}$  structure as the AIMD simulations lasted for 10 ps.

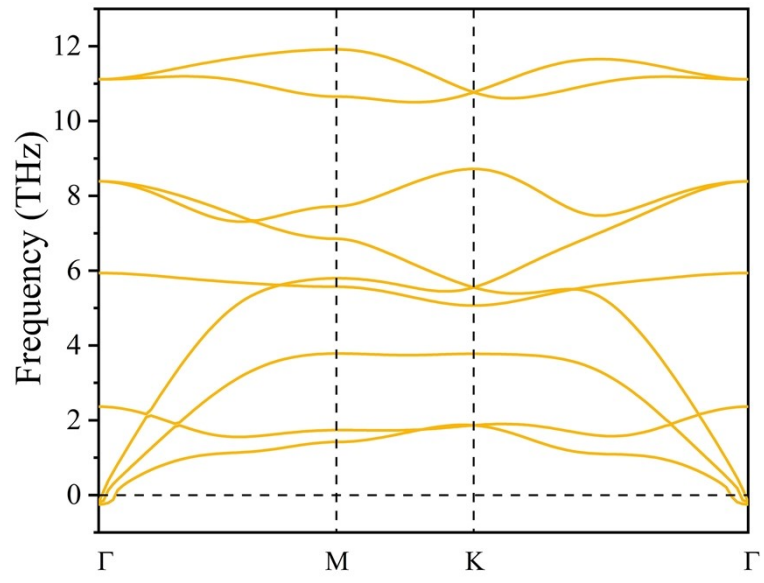

**Fig. S2** Phonon dispersion spectrum of Cu<sub>2</sub>Si monolayer.

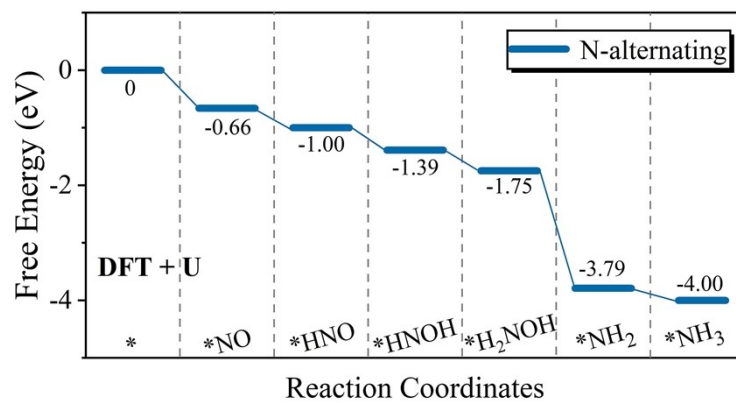

**Fig. S3** Free energy diagram for NORR toward NH<sub>3</sub> on Si site by DFT + *U* method.

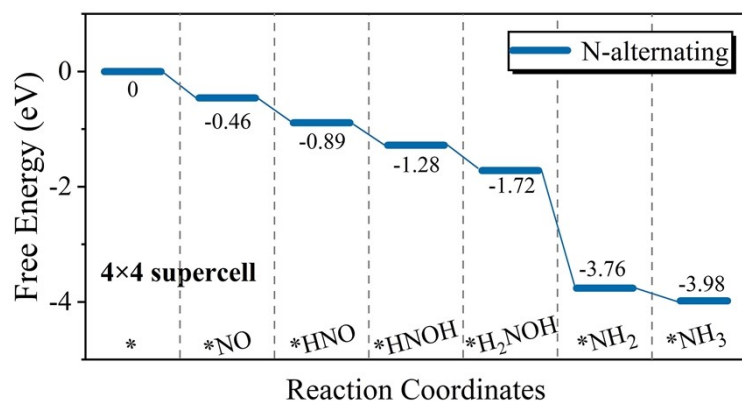

**Fig. S4** Free energy diagram for NORR toward NH<sub>3</sub> on Si site using a 4x4 Cu<sub>2</sub>Si supercell.



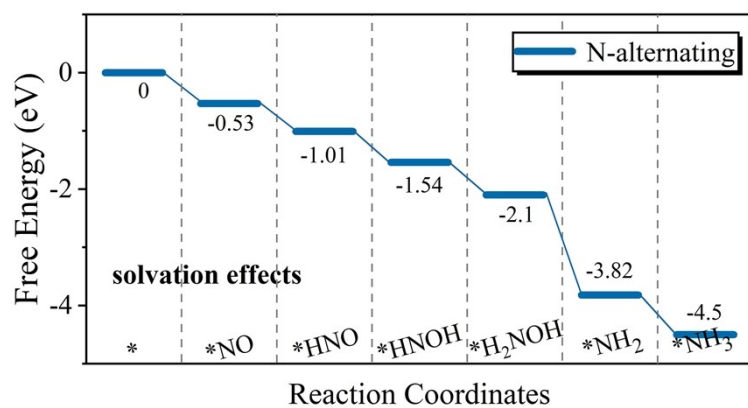

**Fig. S5** Free energy diagram for NORR toward NH<sub>3</sub> on Si site using implicit solvation model.
